# Supplementary material for: Genome-Wide Identification of NAC Transcription Factor Family in Juglans mandshurica and Their Expression Analysis during the Fruit Development and Ripening
Source: MDPI journal article supplement (doi:10.3390/ijms222212414), 2021-11-17
Supplement: s1 [file s1]

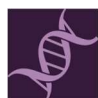

**Table S1.** Basic information of the NAC genes in *Juglans mandshurica*.

| Gene ID               | Gene name | Number of amino acids | Molecular weight (MW) | Theoretical pI(pI) | CDS Length | SL      | Chromosome |
|-----------------------|-----------|-----------------------|-----------------------|--------------------|------------|---------|------------|
| rna-Jman001T0042200.1 | JmNAC001  | 464                   | 51770.78              | 5.92               | 1395       | Nucleus | 1          |
| rna-Jman001T0254600.1 | JmNAC002  | 294                   | 33902.24              | 8.36               | 894        | Nucleus | 1          |
| rna-Jman001T0145400.1 | JmNAC003  | 236                   | 27427.79              | 5.46               | 711        | Nucleus | 1          |
| rna-Jman001T0042300.1 | JmNAC004  | 552                   | 62027.19              | 4.58               | 1659       | Nucleus | 1          |
| rna-Jman001T0289300.1 | JmNAC005  | 378                   | 43706.81              | 5.74               | 1137       | Nucleus | 1          |
| rna-Jman002T0279700.1 | JmNAC006  | 651                   | 74177.15              | 5.56               | 1956       | Nucleus | 2          |
| rna-Jman002T0020400.1 | JmNAC007  | 294                   | 33858.11              | 5.87               | 885        | Nucleus | 2          |
| rna-Jman002T0331500.1 | JmNAC008  | 265                   | 29434.45              | 4.85               | 798        | Nucleus | 2          |
| rna-Jman002T0228100.1 | JmNAC009  | 359                   | 40114.85              | 4.83               | 1080       | Nucleus | 2          |
| rna-Jman002T0349500.1 | JmNAC010  | 267                   | 30729.09              | 9.31               | 804        | Nucleus | 2          |
| rna-Jman002T0309700.1 | JmNAC011  | 558                   | 61752.87              | 6.62               | 1677       | Nucleus | 2          |
| rna-Jman002T0344800.1 | JmNAC012  | 387                   | 43760.68              | 6.74               | 1164       | Nucleus | 2          |
| rna-Jman002T0069800.1 | JmNAC013  | 466                   | 52477.28              | 6.6                | 1401       | Nucleus | 2          |
| rna-Jman002T0226100.1 | JmNAC014  | 132                   | 15770.41              | 9.6                | 399        | Nucleus | 2          |
| rna-Jman002T0260300.1 | JmNAC015  | 332                   | 38409.99              | 6.31               | 999        | Nucleus | 2          |
| rna-Jman002T0328200.1 | JmNAC016  | 309                   | 34511.73              | 4.88               | 930        | Nucleus | 2          |
| rna-Jman002T0139300.1 | JmNAC017  | 249                   | 28051.61              | 9.41               | 750        | Nucleus | 2          |
| rna-Jman002T0231700.1 | JmNAC018  | 195                   | 22452.25              | 4.81               | 588        | Nucleus | 2          |

|                       |          |     |          |      |      |                 |   |
|-----------------------|----------|-----|----------|------|------|-----------------|---|
| rna-Jman002T0235800.1 | JmNAC019 | 289 | 33329.81 | 6.02 | 870  | Nu<br>cle<br>us | 2 |
| rna-Jman003T0241400.1 | JmNAC020 | 162 | 19075.76 | 6.31 | 489  | Nu<br>cle<br>us | 3 |
| rna-Jman003T0136500.1 | JmNAC021 | 408 | 45971.03 | 7.13 | 1227 | Nu<br>cle<br>us | 3 |
| rna-Jman003T0037700.1 | JmNAC022 | 192 | 22074.6  | 5.35 | 579  | Nu<br>cle<br>us | 3 |
| rna-Jman003T0132000.1 | JmNAC023 | 807 | 92614.04 | 6.74 | 2424 | Nu<br>cle<br>us | 3 |
| rna-Jman003T0100700.1 | JmNAC024 | 196 | 22570.87 | 9.65 | 591  | Nu<br>cle<br>us | 3 |
| rna-Jman003T0086200.1 | JmNAC025 | 287 | 33260.96 | 7.78 | 864  | Nu<br>cle<br>us | 3 |
| rna-Jman003T0000600.1 | JmNAC026 | 381 | 43553.53 | 6.77 | 1146 | Nu<br>cle<br>us | 3 |
| rna-Jman003T0242400.1 | JmNAC027 | 462 | 50582.53 | 4.46 | 1389 | Nu<br>cle<br>us | 3 |
| rna-Jman004T0223600.1 | JmNAC028 | 281 | 30065.44 | 4.92 | 846  | Nu<br>cle<br>us | 4 |
| rna-Jman004T0139000.1 | JmNAC029 | 374 | 42724.88 | 5.09 | 1125 | Nu<br>cle<br>us | 4 |
| rna-Jman004T0062200.1 | JmNAC030 | 218 | 25545.17 | 8.59 | 657  | Nu<br>cle<br>us | 4 |
| rna-Jman004T0164800.1 | JmNAC031 | 422 | 48001.29 | 5.81 | 1269 | Nu<br>cle<br>us | 4 |
| rna-Jman004T0088300.1 | JmNAC032 | 330 | 37780.19 | 8.44 | 993  | Nu<br>cle<br>us | 4 |
| rna-Jman004T0056500.1 | JmNAC033 | 357 | 40268.52 | 7.03 | 1074 | Nu<br>cle<br>us | 4 |
| rna-Jman004T0231600.1 | JmNAC034 | 336 | 38454.06 | 7.7  | 1011 | Nu<br>cle<br>us | 4 |
| rna-Jman004T0161100.1 | JmNAC035 | 436 | 48451.99 | 4.75 | 1311 | Nu<br>cle<br>us | 4 |
| rna-Jman004T0004400.1 | JmNAC036 | 260 | 29123.95 | 7.58 | 783  | Nu<br>cle<br>us | 4 |
| rna-Jman004T0231700.1 | JmNAC037 | 365 | 40462.66 | 8.15 | 1098 | Nu<br>cle<br>us | 4 |
| rna-Jman004T0208200.1 | JmNAC038 | 343 | 40011.77 | 6.24 | 1032 | Nu<br>cle<br>us | 4 |

|                       |          |      |           |      |      |                 |   |
|-----------------------|----------|------|-----------|------|------|-----------------|---|
| rna-Jman004T0062100.1 | JmNAC039 | 172  | 20117.74  | 8.88 | 519  | Nu<br>cle<br>us | 4 |
| rna-Jman005T0267700.1 | JmNAC040 | 299  | 32542.32  | 6.14 | 900  | Nu<br>cle<br>us | 5 |
| rna-Jman005T0188200.1 | JmNAC041 | 373  | 41718.13  | 5.6  | 1122 | Nu<br>cle<br>us | 5 |
| rna-Jman005T0066100.1 | JmNAC042 | 244  | 28028.3   | 4.57 | 735  | Nu<br>cle<br>us | 5 |
| rna-Jman005T0151200.1 | JmNAC043 | 243  | 27671.1   | 5.28 | 732  | Nu<br>cle<br>us | 5 |
| rna-Jman006T0241600.1 | JmNAC044 | 289  | 33285.52  | 5.66 | 870  | Nu<br>cle<br>us | 6 |
| rna-Jman006T0081100.1 | JmNAC045 | 290  | 33199.74  | 7.01 | 873  | Nu<br>cle<br>us | 6 |
| rna-Jman006T0029000.1 | JmNAC046 | 1160 | 132712.83 | 5.36 | 3483 | Nu<br>cle<br>us | 6 |
| rna-Jman006T0194000.1 | JmNAC047 | 311  | 35149.96  | 5.75 | 936  | Nu<br>cle<br>us | 6 |
| rna-Jman006T0195700.1 | JmNAC048 | 467  | 52688.32  | 6.43 | 1404 | Nu<br>cle<br>us | 6 |
| rna-Jman006T0084400.1 | JmNAC049 | 198  | 22937.79  | 4.82 | 597  | Nu<br>cle<br>us | 6 |
| rna-Jman006T0085500.1 | JmNAC050 | 310  | 35866.12  | 6.28 | 933  | Nu<br>cle<br>us | 6 |
| rna-Jman006T0049900.1 | JmNAC051 | 681  | 77796.91  | 5.41 | 2046 | Nu<br>cle<br>us | 6 |
| rna-Jman006T0086300.1 | JmNAC052 | 411  | 45629.43  | 4.61 | 1236 | Nu<br>cle<br>us | 6 |
| rna-Jman006T0007200.1 | JmNAC053 | 365  | 42030.85  | 7    | 1098 | Nu<br>cle<br>us | 6 |
| rna-Jman006T0145600.1 | JmNAC054 | 282  | 31947.14  | 9.04 | 849  | Nu<br>cle<br>us | 6 |
| rna-Jman007T0092600.1 | JmNAC055 | 295  | 33968.83  | 5.99 | 888  | Nu<br>cle<br>us | 7 |
| rna-Jman007T0132600.1 | JmNAC056 | 351  | 40185.7   | 4.97 | 1056 | Nu<br>cle<br>us | 7 |
| rna-Jman007T0160300.1 | JmNAC057 | 341  | 38328.96  | 8.29 | 1026 | Nu<br>cle<br>us | 7 |
| rna-Jman007T0004500.1 | JmNAC058 | 468  | 52902.03  | 5.01 | 1407 | Nu<br>cle<br>us | 7 |

|                       |          |     |          |      |      |                 |    |
|-----------------------|----------|-----|----------|------|------|-----------------|----|
| rna-Jman007T0032300.1 | JmNAC059 | 291 | 33328.8  | 6.47 | 876  | Nu<br>cle<br>us | 7  |
| rna-Jman007T0081000.1 | JmNAC060 | 375 | 41669.51 | 7.04 | 1128 | Nu<br>cle<br>us | 7  |
| rna-Jman007T0183200.1 | JmNAC061 | 228 | 25996.11 | 5.06 | 687  | Nu<br>cle<br>us | 7  |
| rna-Jman007T0010900.1 | JmNAC062 | 538 | 61196.44 | 4.8  | 1617 | Nu<br>cle<br>us | 7  |
| rna-Jman007T0128700.1 | JmNAC063 | 343 | 39394.17 | 7.23 | 1032 | Nu<br>cle<br>us | 7  |
| rna-Jman007T0058200.1 | JmNAC064 | 285 | 31801.86 | 6.15 | 858  | Nu<br>cle<br>us | 7  |
| rna-Jman008T0090700.1 | JmNAC065 | 374 | 41947.89 | 9.18 | 1125 | Nu<br>cle<br>us | 8  |
| rna-Jman008T0060700.1 | JmNAC066 | 376 | 43031.34 | 6.5  | 1131 | Nu<br>cle<br>us | 8  |
| rna-Jman008T0205900.1 | JmNAC067 | 303 | 34277.44 | 6.54 | 912  | Nu<br>cle<br>us | 8  |
| rna-Jman008T0256800.1 | JmNAC068 | 265 | 30268.81 | 6.01 | 798  | Nu<br>cle<br>us | 8  |
| rna-Jman008T0216000.1 | JmNAC069 | 347 | 38155.58 | 8.42 | 1044 | Nu<br>cle<br>us | 8  |
| rna-Jman008T0111400.1 | JmNAC070 | 335 | 38413.39 | 8.72 | 1008 | Nu<br>cle<br>us | 8  |
| rna-Jman009T0000400.1 | JmNAC071 | 388 | 43665.14 | 6.36 | 1167 | Nu<br>cle<br>us | 9  |
| rna-Jman009T0034100.1 | JmNAC072 | 364 | 41481.46 | 5.34 | 1095 | Nu<br>cle<br>us | 9  |
| rna-Jman009T0135400.1 | JmNAC073 | 327 | 37286.09 | 8.29 | 984  | Nu<br>cle<br>us | 9  |
| rna-Jman009T0055100.1 | JmNAC074 | 307 | 34822.89 | 6.95 | 924  | Nu<br>cle<br>us | 9  |
| rna-Jman009T0012900.1 | JmNAC075 | 269 | 30686.87 | 5.56 | 810  | Nu<br>cle<br>us | 9  |
| rna-Jman010T0030200.1 | JmNAC076 | 547 | 61674.8  | 4.65 | 1644 | Nu<br>cle<br>us | 10 |
| rna-Jman010T0173400.1 | JmNAC077 | 517 | 59629.45 | 6.28 | 1554 | Nu<br>cle<br>us | 10 |
| rna-Jman010T0176100.1 | JmNAC078 | 416 | 46879.98 | 5.87 | 1251 | Nu<br>cle<br>us | 10 |

|                       |          |     |          |      |      |                 |    |
|-----------------------|----------|-----|----------|------|------|-----------------|----|
| rna-Jman011T0121400.1 | JmNAC079 | 314 | 35194.61 | 5.16 | 945  | Nu<br>cle<br>us | 11 |
| rna-Jman011T0042100.1 | JmNAC080 | 706 | 77661.55 | 5.06 | 2121 | Nu<br>cle<br>us | 11 |
| rna-Jman011T0147600.1 | JmNAC081 | 194 | 22380.84 | 9.83 | 585  | Nu<br>cle<br>us | 11 |
| rna-Jman011T0160100.1 | JmNAC082 | 311 | 35891.96 | 6.11 | 936  | Nu<br>cle<br>us | 11 |
| rna-Jman011T0042200.1 | JmNAC083 | 516 | 57091.17 | 4.52 | 1551 | Nu<br>cle<br>us | 11 |
| rna-Jman011T0042400.1 | JmNAC084 | 831 | 93936.83 | 4.92 | 2496 | Nu<br>cle<br>us | 11 |
| rna-Jman011T0124700.1 | JmNAC085 | 280 | 32251.37 | 8.22 | 843  | Nu<br>cle<br>us | 11 |
| rna-Jman012T0120300.1 | JmNAC086 | 339 | 38719.67 | 8.27 | 1020 | Nu<br>cle<br>us | 12 |
| rna-Jman012T0193900.1 | JmNAC087 | 362 | 40968.35 | 4.74 | 1089 | Nu<br>cle<br>us | 12 |
| rna-Jman012T0162800.1 | JmNAC088 | 407 | 45992.82 | 6.62 | 1224 | Nu<br>cle<br>us | 12 |
| rna-Jman012T0162900.1 | JmNAC089 | 77  | 8773.86  | 4.21 | 234  | Nu<br>cle<br>us | 12 |
| rna-Jman012T0194400.1 | JmNAC090 | 362 | 40937.34 | 4.74 | 1089 | Nu<br>cle<br>us | 12 |
| rna-Jman012T0194200.1 | JmNAC091 | 362 | 41013.35 | 4.74 | 1089 | Nu<br>cle<br>us | 12 |
| rna-Jman012T0185900.1 | JmNAC092 | 213 | 24127.68 | 7.66 | 642  | Nu<br>cle<br>us | 12 |
| rna-Jman012T0164200.1 | JmNAC093 | 362 | 41013.35 | 4.74 | 747  | Nu<br>cle<br>us | 12 |
| rna-Jman013T0187000.1 | JmNAC094 | 378 | 41860.33 | 9.31 | 1137 | Nu<br>cle<br>us | 13 |
| rna-Jman013T0129100.1 | JmNAC095 | 386 | 43392.15 | 6.8  | 1161 | Nu<br>cle<br>us | 13 |
| rna-Jman014T0070800.1 | JmNAC096 | 416 | 47477.7  | 5.62 | 1251 | Nu<br>cle<br>us | 14 |
| rna-Jman014T0022400.1 | JmNAC097 | 353 | 40089.96 | 6.76 | 1062 | Nu<br>cle<br>us | 14 |
| rna-Jman014T0086200.1 | JmNAC098 | 344 | 38987.75 | 5.47 | 1035 | Nu<br>cle<br>us | 14 |

|                       |          |     |          |      |      |                 |    |
|-----------------------|----------|-----|----------|------|------|-----------------|----|
| rna-Jman014T0022300.1 | JmNAC099 | 362 | 40123.14 | 8.84 | 1089 | Nu<br>cle<br>us | 14 |
| rna-Jman014T0154400.1 | JmNAC100 | 356 | 40306.47 | 8.25 | 1071 | Nu<br>cle<br>us | 14 |
| rna-Jman014T0038300.1 | JmNAC101 | 355 | 41498.14 | 6.48 | 1068 | Nu<br>cle<br>us | 14 |
| rna-Jman014T0175400.1 | JmNAC102 | 236 | 26646.9  | 8.62 | 711  | Nu<br>cle<br>us | 14 |
| rna-Jman014T0027000.1 | JmNAC103 | 415 | 45933.85 | 8.93 | 1248 | Nu<br>cle<br>us | 14 |
| rna-Jman014T0158600.1 | JmNAC104 | 304 | 34249.64 | 6.71 | 915  | Nu<br>cle<br>us | 14 |
| rna-Jman015T0044000.1 | JmNAC105 | 475 | 52812.87 | 8.56 | 1428 | Nu<br>cle<br>us | 15 |
| rna-Jman015T0072700.1 | JmNAC106 | 297 | 34079.45 | 8.36 | 894  | Nu<br>cle<br>us | 15 |
| rna-Jman015T0042500.1 | JmNAC107 | 243 | 27616.14 | 6.46 | 732  | Nu<br>cle<br>us | 15 |
| rna-Jman016T0028600.1 | JmNAC108 | 285 | 32441.76 | 8.42 | 858  | Nu<br>cle<br>us | 16 |
| rna-Jman016T0046500.1 | JmNAC109 | 292 | 32490.67 | 6.12 | 879  | Nu<br>cle<br>us | 16 |
| rna-Jman016T0085400.1 | JmNAC110 | 325 | 37219.97 | 8.09 | 978  | Nu<br>cle<br>us | 16 |
| rna-Jman016T0115200.1 | JmNAC111 | 246 | 28556.07 | 5.26 | 741  | Nu<br>cle<br>us | 16 |
| rna-Jman016T0062100.1 | JmNAC112 | 340 | 37481.86 | 4.87 | 1023 | Nu<br>cle<br>us | 16 |
| rna-Jman016T0096400.1 | JmNAC113 | 333 | 37809.36 | 6.45 | 1002 | Nu<br>cle<br>us | 16 |
| rna-Jman016T0006600.1 | JmNAC114 | 566 | 63625.84 | 5.02 | 1701 | Nu<br>cle<br>us | 16 |

Table S2. Primer sequences of *J. mandshurica*.

| Gene name       | Forward primer (F)         | Reverse primer (R)         |
|-----------------|----------------------------|----------------------------|
| 18s RNA         | GAGGTAGCTTCGGGCGCAACT      | GCAGGTTAGCGAAATGCGATAC     |
| <i>JmNAC105</i> | GACCCATCAGCTTTCTCTTCACCC   | AGTCAGGCCATCTCTCAACCTCAGT  |
| <i>JmNAC104</i> | ATGCGATTACTTGATGGGGAAGGCC  | ACCAAGATGATGATGAGGGGATCGA  |
| <i>JmNAC108</i> | CGGTGGCGATGGTCCCTTTCTTAAA  | TTGCTTCCCGATACTGCCCTTCTTG  |
| <i>JmNAC085</i> | TGGTACTTCTTTAGCCCGCGTGATC  | AAACACCAGAGCTTTCTTCACCCCA  |
| <i>JmNAC001</i> | CGGTTTCTCCTCCATTTGATCCTGCT | GCGAATCATGGTTTGGGCACTCATC  |
| <i>JmNAC045</i> | TGCGTCGTGGGTCAAGCTTAATCTT  | CCACTCCTTTTCACCGTACAGAGCC  |
| <i>JmNAC023</i> | AACGAGTGGTACTTCTTTAGCCCGC  | ACACAAGAGCTTTCTTCACCCCAACA |
| <i>JmNAC071</i> | TGGGTTGTCTGCAGAGTTTCCACA   | ACAGCTAGGCCTTTCGTTGTTGGAA  |
| <i>JmNAC019</i> | TCATCAATGATCACCGGCGACCAAT  | TCTCCTCCCACTTGGCTTCACTTG   |
| <i>JmNAC010</i> | CTCTATCCCATTGCCGGCTTCAGTC  | ACAAACACACACACACACACCT     |
| <i>JmNAC097</i> | TCAAAGTGAACCCATAACTCAGCGG  | TTTTACTGTTCGGAACCTCGGAACCC |
| <i>JmNAC059</i> | TCTTTTCGCCTAGGGACCGGAAGTA  | TGCCGGAGTAAAACACAAGAGCCTT  |

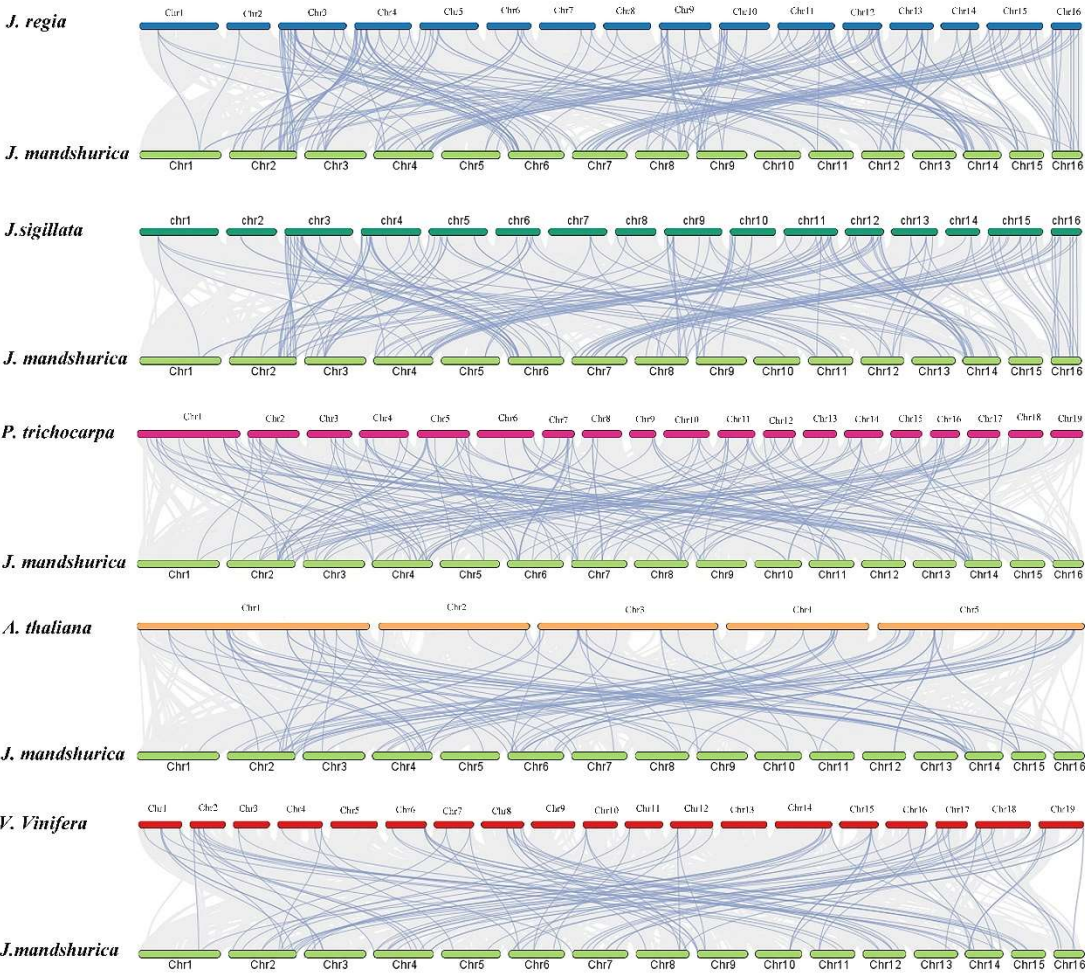

Figure S1. Synteny analysis of NAC genes in *J. mandshurica* and five representative plant species. Grey lines in the background indicate collinear blocks within *J. mandshurica* and other plant genomes, whereas blue lines highlight syntenic *JmNAC* gene pairs.
